# Supplementary material for: Tissue deconjugation of urolithin A glucuronide to free urolithin A in systemic inflammation
Source: Royal Society of Chemistry journal article supplement (doi:10.1039/c9fo00298g), 2019-01-01
Supplement: c9fo00298g1.pdf [file c9fo00298g1.pdf]

**Supplementary Fig. 1** Design of the animal interventions.

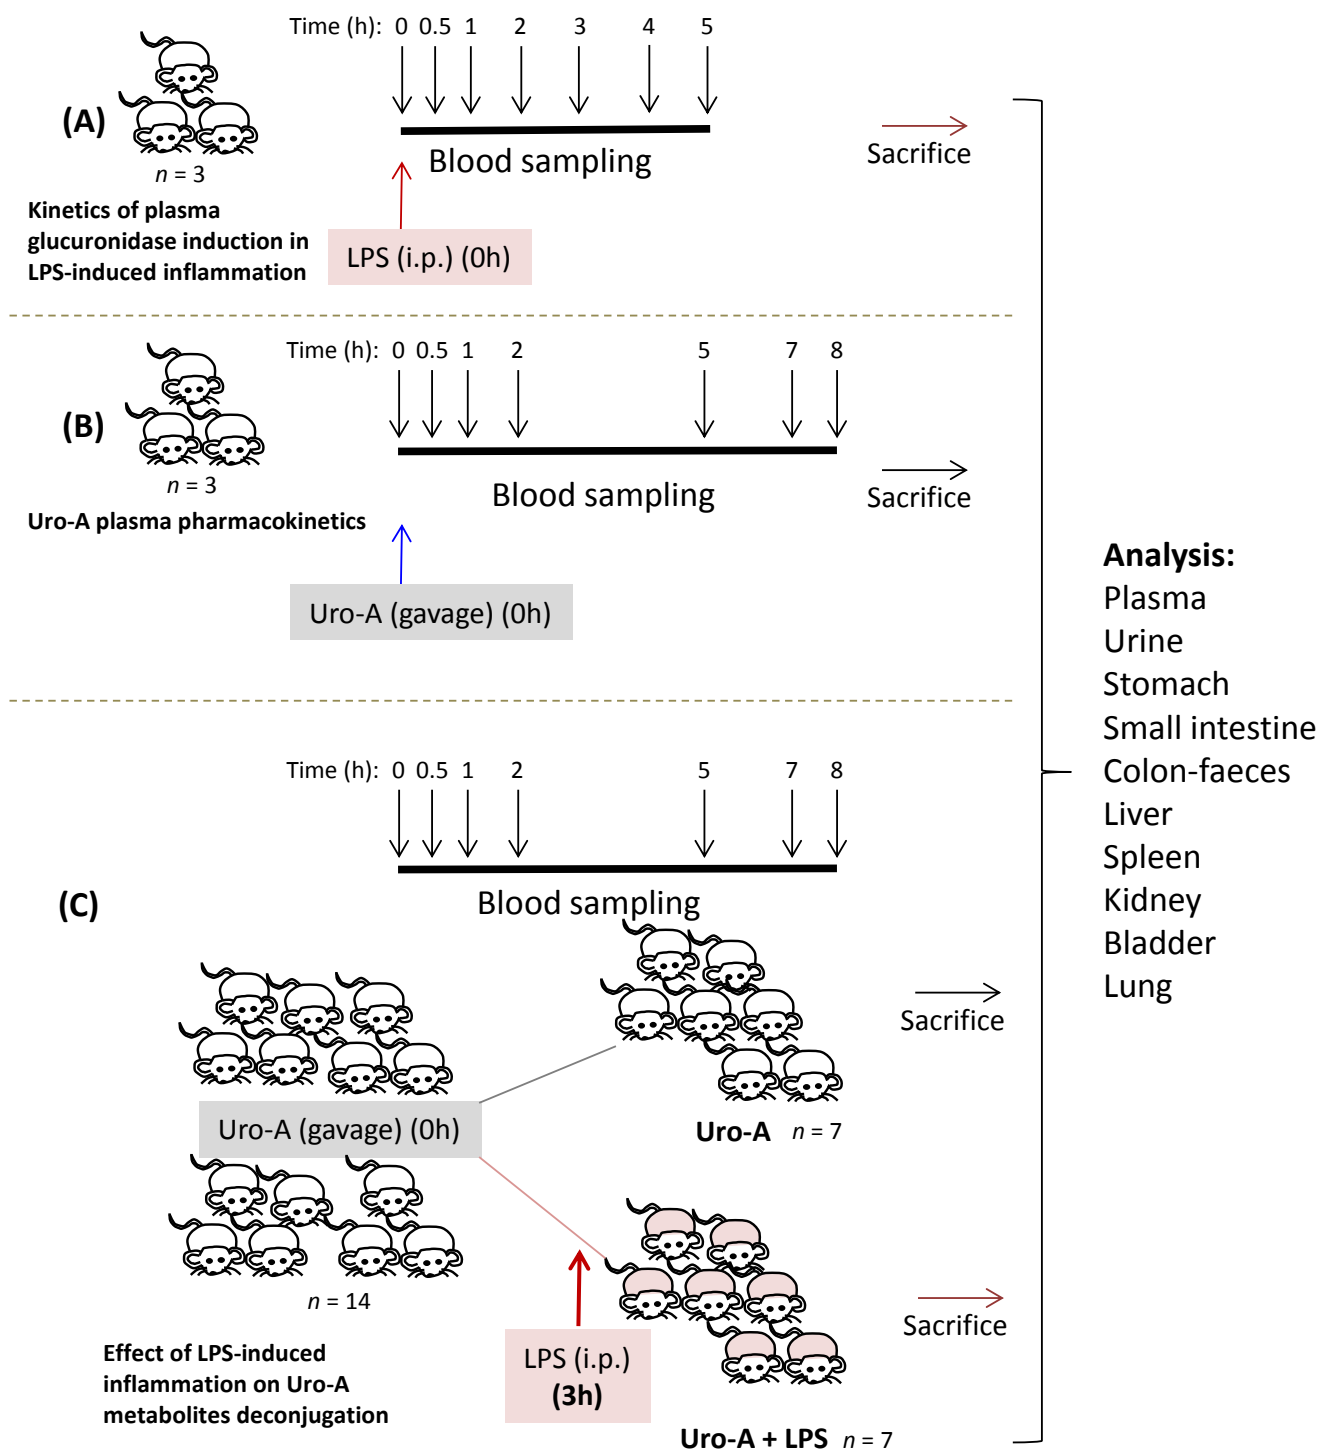

**Supplementary Fig. 2** Kinetics of plasma  $\beta$ -glucuronidase activity after LPS i.p. administration.

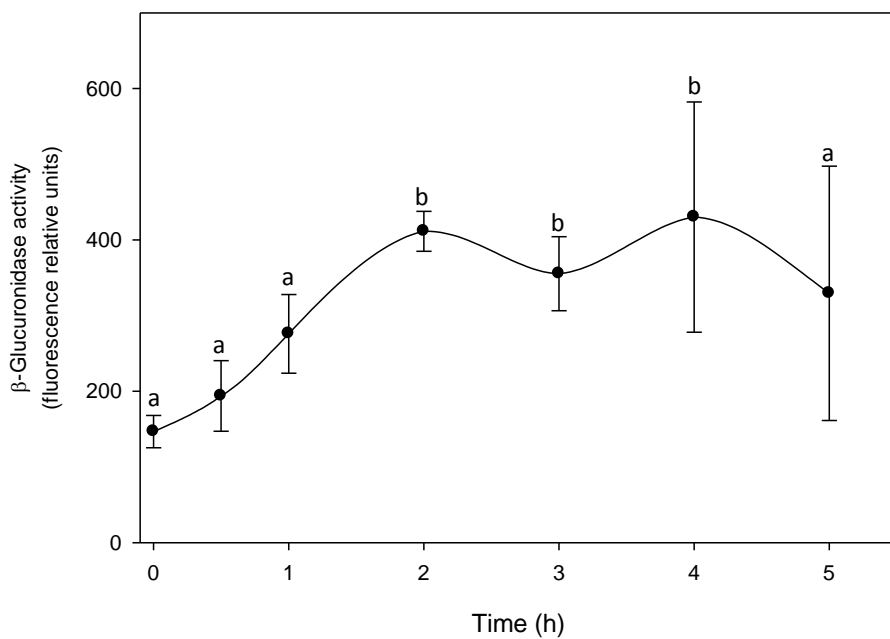

Results are shown as mean  $\pm$  SD. Differences in mean parameter values among treatment groups were determined by one-way RM ANOVA. In cases where overall statistical significance was determined, the data were further analyzed by all pair-wise multiple comparison (Holm-Sidak method). Different letters designate statistical significance ( $P < 0.05$ ).

**Supplementary Figure 3.** Plasma pharmacokinetics of Uro-A sulphate after oral Uro-A administration.

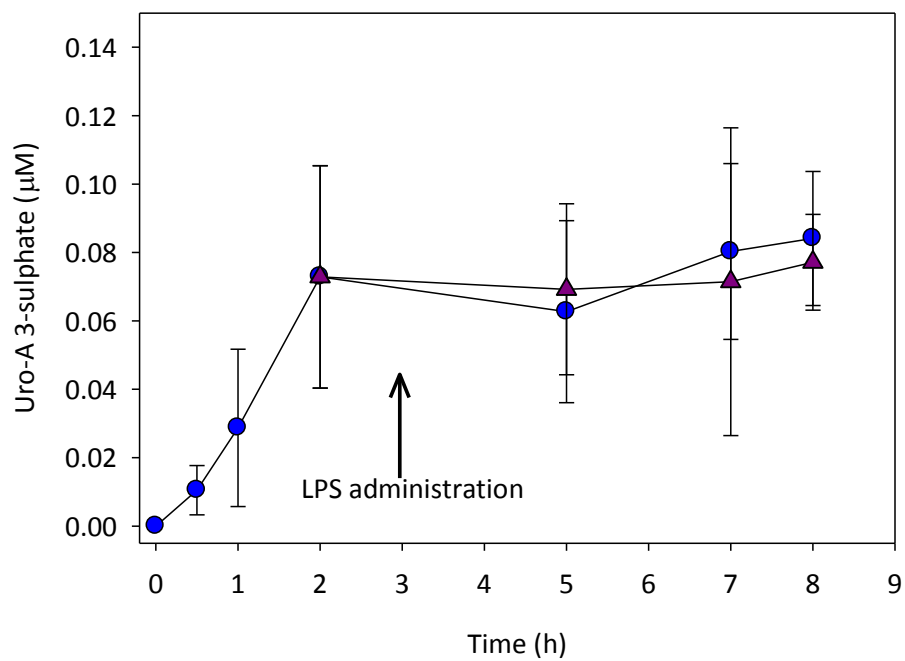

Mean values  $\pm$  SD are shown. ■ Control; ■ LPS-treated rats.
